# Supplementary material
Source: PubMed Central journal article supplement (PMC3660094)
Supplement: NIHMS432586-supplement-01.pdf [file NIHMS432586-supplement-01.pdf]

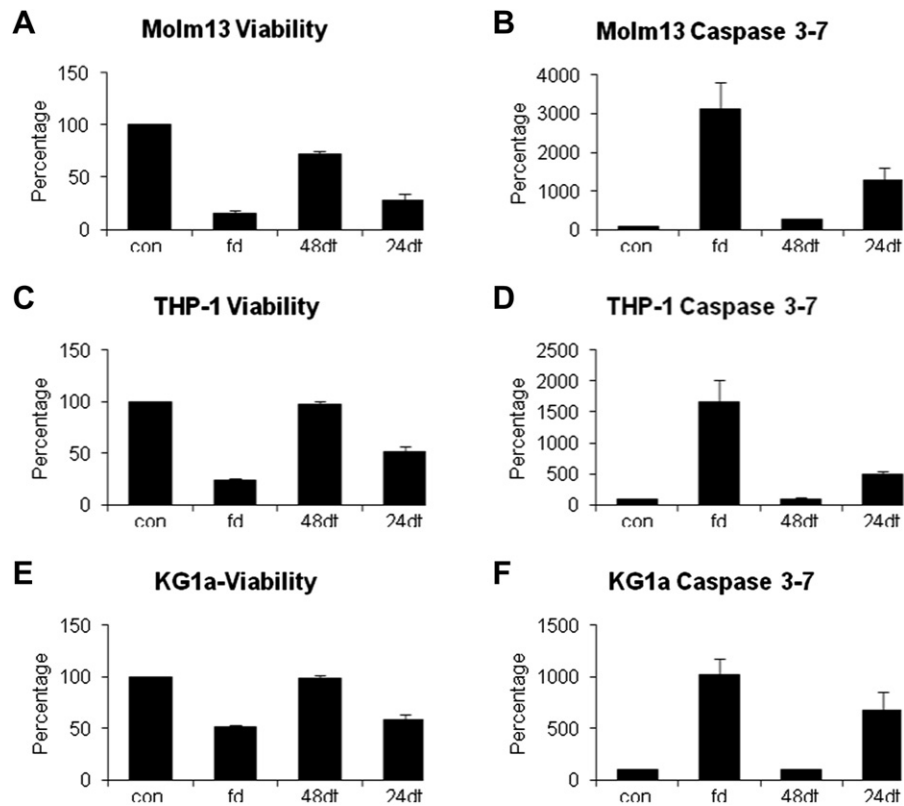

**Supplementary Figure E1.** FdUMP[10] (10nM) decreases viability and induces apoptosis in Molm13 (A,B), THP1 (C,D), and KG1a (E,F) AML cells. FdUMP[10] displays strong potency to a variety of AML cells. Assayed at 48hrs with or without addition of thymidine (dT) for the times indicated. Thy rescue for 48 h was significant ( $p < 1.5 \times 10^{-7}$  for viability;  $p < 3 \times 10^{-5}$  for apoptosis).

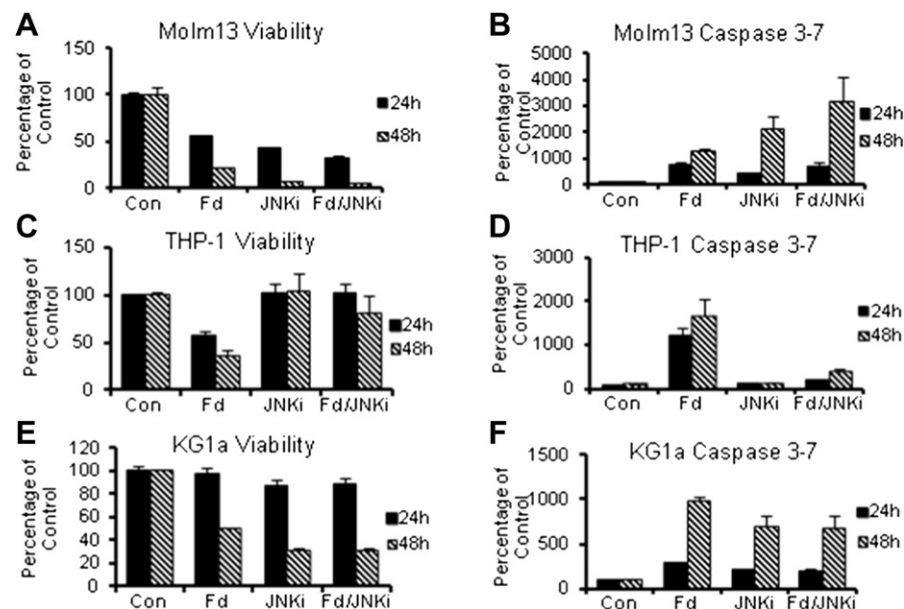

**Supplementary Figure E2.** FdUMP[10] (10 nM) induced apoptosis in Molm13 (A,B), THP1 (C,D), and KG1a (E,F) AML cells. Apoptosis is blocked by Jnk inhibition (SP600125 10  $\mu$ M) in THP-1 cells (significant at 24 ( $p < 0.0003$ ) and 48 h ( $p < 0.004$ ) – based on eight observations) as in HL60 cells but is not significantly changed in wt p53 Molm13 cells.

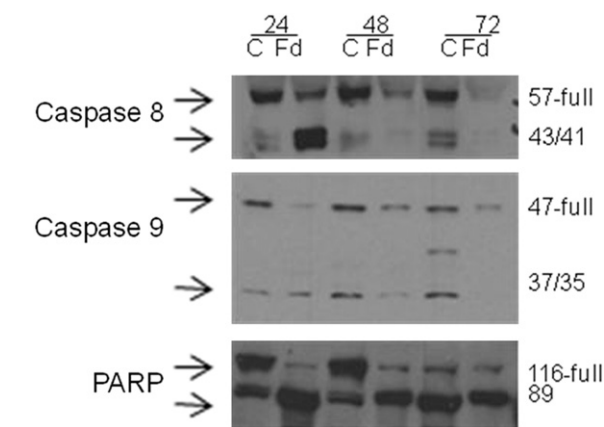

**Supplementary Figure E3.** WB showing FdUMP[10] treatment (10 nM) for times 24 h or longer results in cleavage of caspase 8 and 9 as well as PARP cleavage, consistent with activation of both the intrinsic and extrinsic apoptotic pathways in HL60 cells.

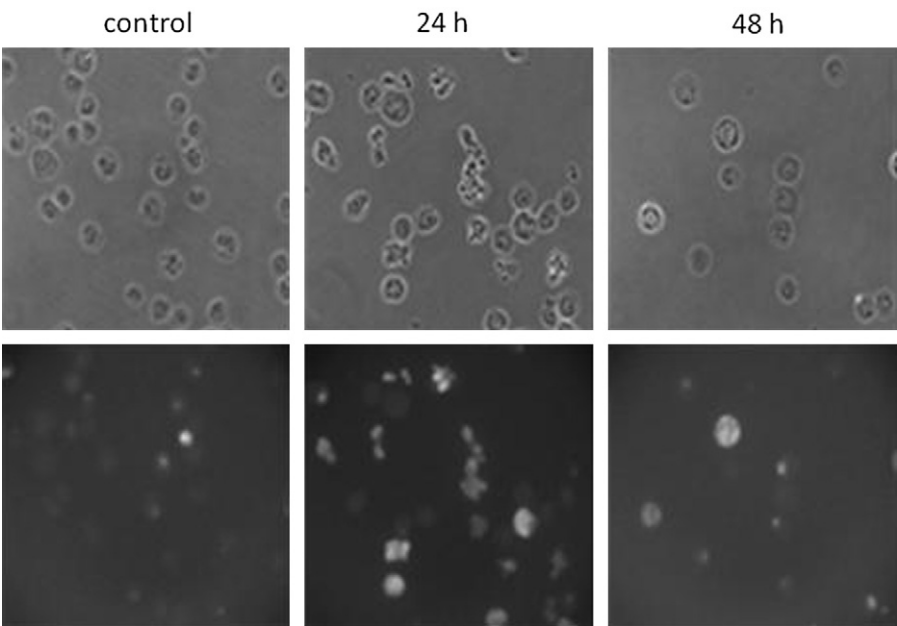

**Supplementary Figure E4.** Immunofluorescence images demonstrating that cleaved caspase3 is present in the majority of HL60 cells following treatment with 10 nM FdUMP[10] for 24 h (lower middle) and 48 h (lower right). Few control (vehicle-only) HL60 cells display cleaved caspase 3 (lower left). Bright field images of the same fields across the top.

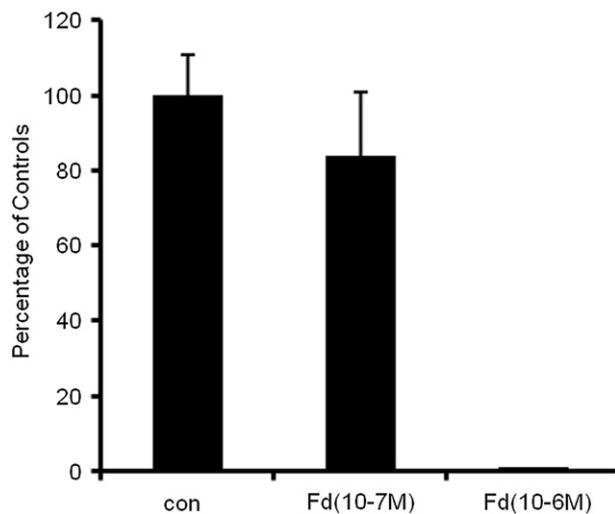

**Supplementary Figure E5.** Graph of concentration dependence of TS activity in Molm13 treated with vehicle-only (con) or FdUMP[10] at 1–10  $\mu$ M for 24 h. FdUMP[10] strongly inhibited TS in THP-1 and KG1a cells at 0.1  $\mu$ M, but required 1  $\mu$ M for effective significant inhibition vs control in Molm13 cells ( $p < 0.005$  based on at least five observations).

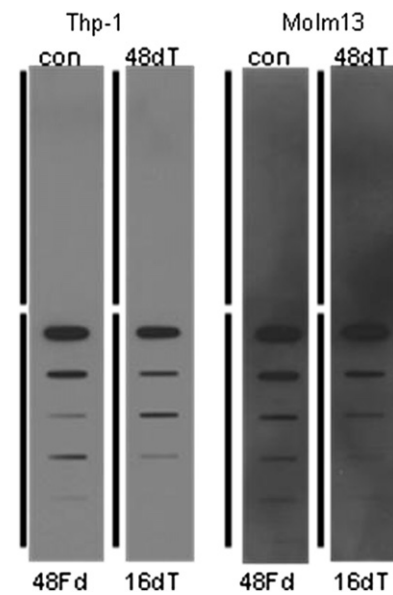

**Supplementary Figure E7.** ICE bioassays detecting Top1CC formed in THP1 and Molm13 cells following treatment with FdUMP[10] for 48 h or with 32 h thymidine rescue (16dT).

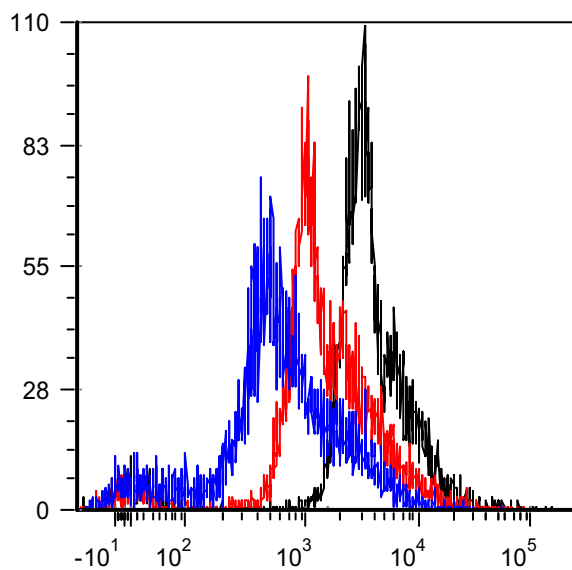

**Supplementary Figure E6.** Time-dependence of fluorescence intensity for HL60 cells incubated with Cell-trace (Invitrogen) determined by flow cytometry. The mean fluorescence intensity after 24 h (red) and 48 h (blue) is less than 0.5 and 0.25 times the initial value (black) consistent with HL60 cells replicating and dividing  $< 20$  h.

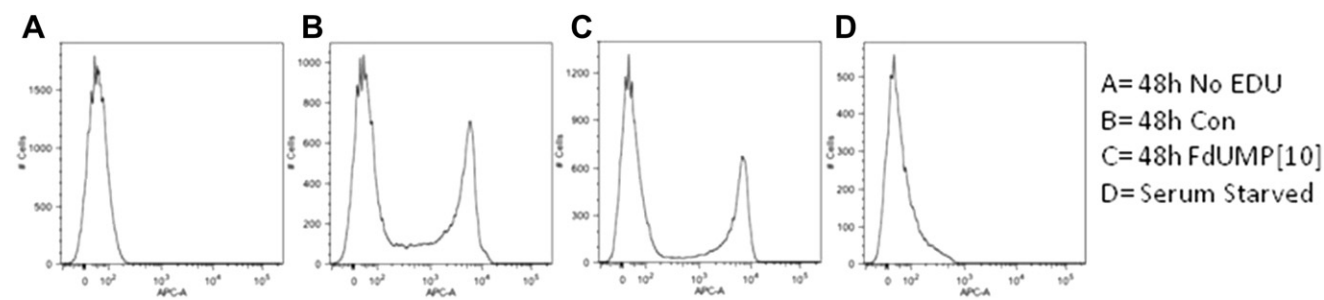

**Supplementary Figure E8.** Flow cytometry analysis of EdU incorporation into DNA for HL60 cells (**A**) no EdU in control cell; (**B**) Control cells with EdU treatment for 3 h - the right-shifted peak is due to newly synthesized DNA in which EdU has been incorporated; (**C**) Cells treated with FdUMP[10] for 48 h which DNA histogram analysis indicate are predominantly in G1- a similar amount of EdU is incorporated as for the control cells; (**D**) Cells synchronized in G0/G1 by serum starvation- these cells display very little EdU incorporation.

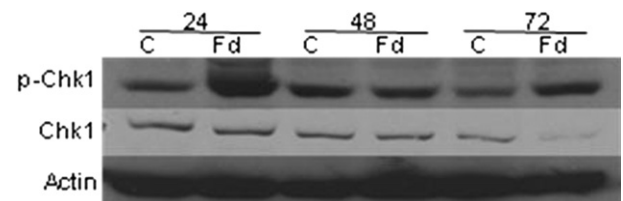

**Supplementary Figure E9.** Western blot showing activation of Chk1 (pS345) 24 h following FdUMP[10] treatment.
